# Supplementary material
Source: HighWire-hosted journal article supplement (http://jpet.aspetjournals.org/highwire/filestream/139652/field_highwire_adjunct_files/0/238212suppldata.pdf)
Supplement: 238212suppldata.pdf [file 238212suppldata.pdf]

# The glycolytic enzyme PFKFB3 is involved in estrogen-mediated angiogenesis via GPER1

A. Trenti et al.

## Supplemental data

### Methods

**Chemicals.** ICI 182,780 and the selective PFKFB3 inhibitor PFK15 were purchased from Tocris Bioscience, Bristol, UK.

**Real-time PCR.** HUVECs ( $3 \times 10^5$ /well) were grown in 35-mm dishes and stimulated with E2 ( $10^{-8}$  –  $10^{-7}$  M) for 0.5 to 3 h in phenol red-free complete M199 medium with 5% FBS. mRNA levels were measured by Q-PCR using the primer pair GCGTCCCCACAAAAGTGTTTC (forward) and CCGGACTTTCATGGCTTCCT (reverse), and normalized to 18S. Data are expressed as mean  $\pm$  S.E.M. of 3 independent experiments.

### Results

**Supplemental Figure 1.**  $17\beta$ -Estradiol treatment did not affect *PFKFB3* mRNA levels in HUVECs.

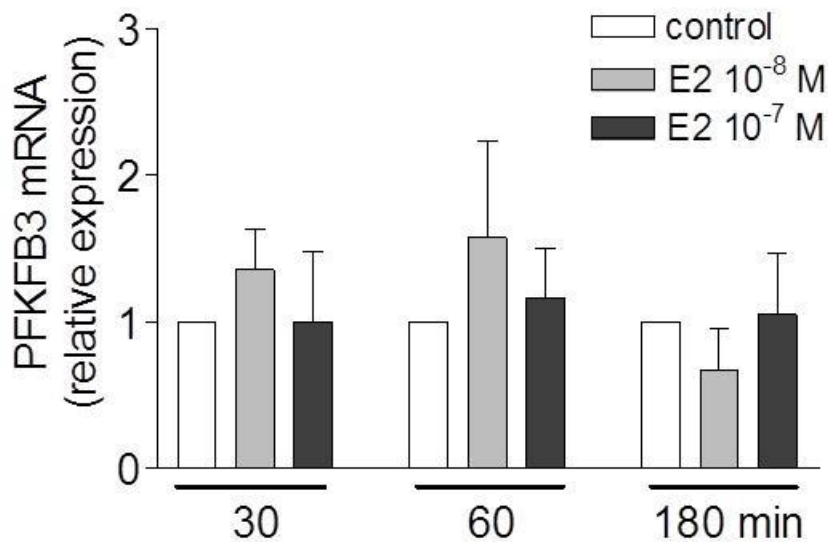

**Supplemental Figure 2.** ICI 182,780 failed to abolish the effect of E2 on PFKFB3 protein amount in HUVECs.

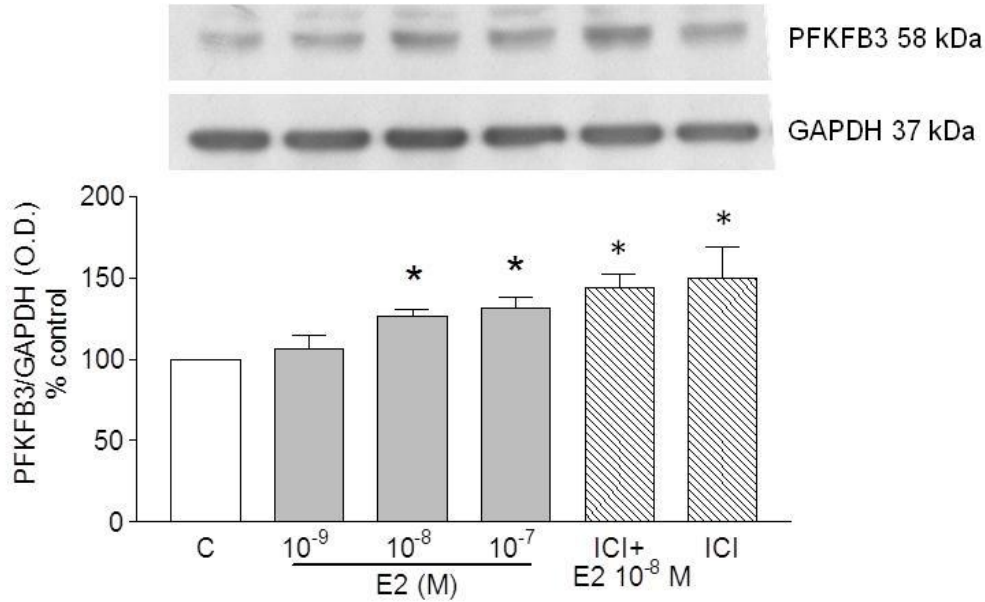

HUVECs ( $3 \times 10^5$ /well) were grown in 35-mm dishes and, after reaching confluence, stimulated with E2 ( $10^{-9}$  –  $10^{-7}$  M) for 3 h in phenol red-free complete M199 medium with 5% FBS. The ER antagonist, ICI182,780 ( $10^{-6}$  M), was added 30 min before the experiment and was present during the experiment. Cell lysates were subjected to Western blotting as described in Methods. *Upper part:* representative experiment showing the expression of PFKFB3; GAPDH expression was used as loading control. *Lower part:* densitometric analysis, normalized to GAPDH levels, expressed as % of control (mean  $\pm$  S.E.M. from 4 independent experiments). \*  $P < 0.05$  vs. control, One-way ANOVA, Dunnett's post-hoc test).

**Supplemental Figure 3.** The PFKFB3 inhibitor 1-(4-pyridinyl)-3-(2-quinolinyl)-2-propen-1-one (PFK15; Tocris Bioscience) reduced the formation of tube-like structures induced by ER ligands (panel A) without affecting cell viability (panel B).

**A**

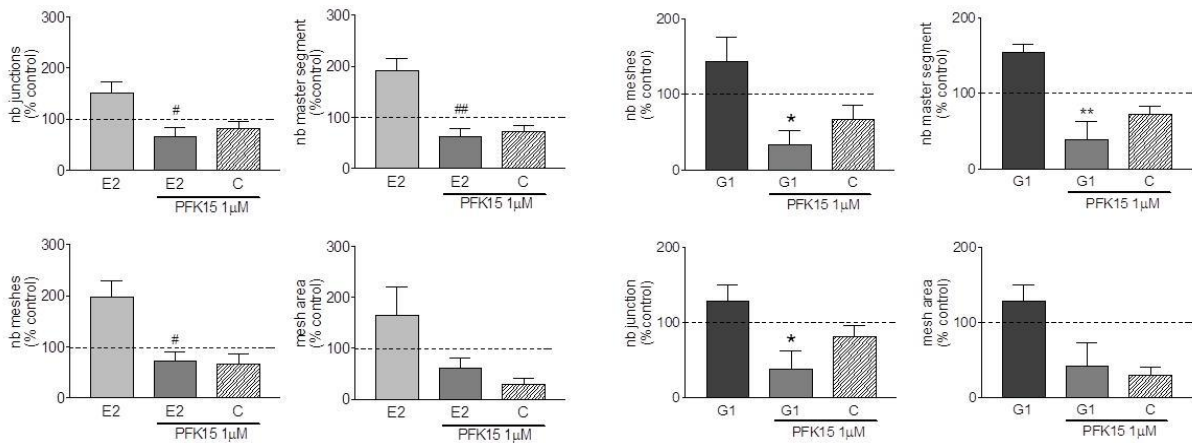

**B**

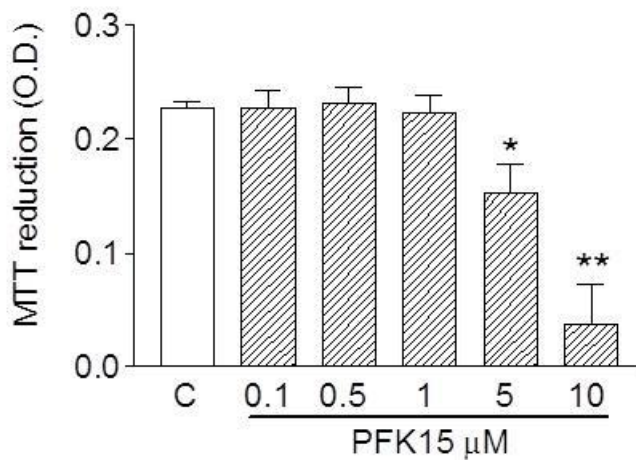

**A)** HUVECs ( $7 \times 10^3$  cells/well) were seeded onto Matrigel-coated 48-well plates in phenol red-free M199 medium with 5% FBS containing E<sub>2</sub> or G-1 (both  $10^{-7}$  M) in the presence or absence of PFK15 (1 μM). Parameters of capillary tube formation after 4 h incubation were measured using Angiogenesis Analyser (ImageJ). Data are expressed as mean  $\pm$  S.E.M. of 3 independent experiments. One-way ANOVA, Bonferroni's post-hoc test, #  $P < 0.05$  vs. E<sub>2</sub>; ##  $P < 0.01$  vs. E<sub>2</sub>; \*  $P < 0.05$  vs. G1; \*\*  $P < 0.01$  vs. G1.

**B)** HUVECs ( $10^4$  cells/well) were plated in 96-well plates and incubated in phenol red-free M199 medium with 5% FBS in the presence of PFK15 (0.1 – 10 μM). Cell viability was measured by MTT assay as described in Methods. Data are the mean  $\pm$  S.E.M. of 3 independent experiments performed in quadruplicate. One-way ANOVA, Dunnett's post-hoc test, \*  $P < 0.05$  vs. Control; \*\*  $P < 0.01$  vs. Control.
